# Supplementary material for: Partial Characterization of Three Bacteriophages Isolated from Aquaculture Hatchery Water and Their Potential in the Biocontrol of Vibrio spp.
Source: MDPI journal article supplement (doi:10.3390/microorganisms12050895), 2024-04-29
Supplement: s1 [file s1]

**Supplementary Table S1.** Homologues of *Vibrio* isolates according to the 16S ribosomal RNA gene

| <b>Isolates (this study)</b> | <b>Species and accession numbers</b>     | <b>16S rDNA homology</b> |
|------------------------------|------------------------------------------|--------------------------|
| Gdp1 (PP270122)              | <i>Vibrio harveyi</i> (MT269608.1)       | 99.62%                   |
| Gdp3 (PP270123)              | <i>Vibrio fluvialis</i> (CP053664.1)     | 99.91%                   |
| Gdp5 (PP270124)              | <i>Vibrio fluvialis</i> (OY760100.1)     | 99.91%                   |
| Gdp6 (PP270125)              | <i>Vibrio harveyi</i> (CP051123.1)       | 99.91%                   |
| Gdp8 (PP270126)              | <i>Vibrio vulnificus</i> (MT052541.1)    | 99.54%                   |
| Gdp9 (PP270127)              | <i>Vibrio chagasii</i> (MN938232.1)      | 99.37%                   |
| Gdp10 (PP270128)             | <i>Vibrio sinaloensis</i> (MK995606.1)   | 99.79%                   |
| Gdp11 (PP270129)             | <i>Vibrio chagasii</i> (LN832954.1)      | 99.36%                   |
| Gdp14 (PP270130)             | <i>Vibrio harveyi</i> (KT982469.1)       | 98.74%                   |
| Gdp15 (PP270131)             | <i>Vibrio crassostreae</i> (MT510175.1)  | 99.53%                   |
| Gdp16 (PP270132)             | <i>Vibrio diabolicus</i> (OP565040.1)    | 99.19%                   |
| Gdp17 (PP270133)             | <i>Vibrio harveyi</i> (PP053299.1)       | 99.90%                   |
| Gdp18 (PP270134)             | <i>Vibrio alginolyticus</i> (MN938363.1) | 99.04%                   |
| Gdp19 (PP270135)             | <i>Vibrio anguillarum</i> (KC210822.1)   | 99.83%                   |
| Gdp20 (PP270136)             | <i>Vibrio anguillarum</i> (CP022101.1)   | 99.83%                   |
| Gdp22 (PP270137)             | <i>Vibrio harveyi</i> (KX904711.1)       | 99.83%                   |
| Gdp24 (PP270138)             | <i>Vibrio alginolyticus</i> (MH643643.1) | 99.23%                   |
| Gdp25 (PP270139)             | <i>Vibrio harveyi</i> (MN938174.1)       | 99.25%                   |
| Gdp28 (PP270140)             | <i>Vibrio harveyi</i> (MT071393.1)       | 99.54%                   |
| Gdp29 (PP270141)             | <i>Vibrio harveyi</i> (MT605241.1)       | 99.35%                   |
| Gdp30 (PP270142)             | <i>Vibrio anguillarum</i> (CP023310.1)   | 99.48%                   |
| Gdp31 (PP270143)             | <i>Vibrio mediterranei</i> (MN945279.1)  | 96.96%                   |
| Gdp32 (PP270144)             | <i>Vibrio azureus</i> (MH298563.1)       | 97.13%                   |
| Gdp33 (PP270145)             | <i>Vibrio scophthalmi</i> (OM837045.1)   | 97.73%                   |
| Gdp34 (PP270146)             | <i>Vibrio anguillarum</i> (LC365684.1)   | 98.00%                   |
| Gdp35 (PP270147)             | <i>Vibrio scophthalmi</i> (OM837037.1)   | 98.38%                   |
| Gdp36 (PP270148)             | <i>Vibrio qinghaiensis</i> (CP022741.1)  | 96.85%                   |
| Gdp37 (PP270149)             | <i>Vibrio qinghaiensis</i> (CP022741.1)  | 98.43%                   |
| Gdp38 (PP270150)             | <i>Vibrio scophthalmi</i> (OM837049.1)   | 98.42%                   |
| Gdp39 (PP270151)             | <i>Vibrio scophthalmi</i> (OM837029.1)   | 98.59%                   |
| Gdp41 (PP270152)             | <i>Vibrio ordalii</i> (KC884626.1)       | 98.43%                   |
| Gdp42 (PP270153)             | <i>Vibrio neonatus</i> (MN939469.1)      | 96.96%                   |
